# Supplementary material for: The control of translational accuracy is a determinant of healthy ageing in yeast
Source: PubMed Central journal article supplement (PMC5303280; doi:10.1098/rsob.160291), 2017-01-18
Supplement: rsob160291supp1.pdf [file rsob160291supp1.pdf]

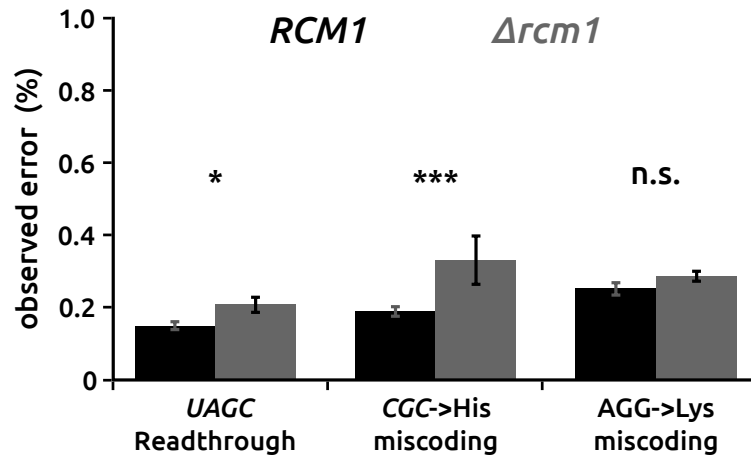

**Supplemental Figure 1. Translational accuracy in an *rcm1* deletion strain.** Bars indicate averages and standard deviations obtained with eight separate transformants. Statistical significance as determined by one-way ANOVA and post-hoc testing (Tukey HSD) is indicated as follows: n.s.,  $p > 0.05$ ; \*,  $p < 0.05$ ; \*\*\*,  $p < 0.001$ .
